# Supplementary material
Source: PubMed Central journal article supplement (PMC7969865)

## **2D MXenes with antiviral and immunomodulatory properties: a pilot study against SARS-CoV-2**

Mehmet Altay Unal<sup>1#</sup>, Fatma Bayrakdar<sup>2#</sup>, Laura Fusco<sup>3,4#</sup>, Omur Besbinar<sup>1,5</sup>, Christopher E. Shuck<sup>6</sup>, Süleyman Yalcin<sup>2</sup>, Mine Turktas Erken<sup>7</sup>, Aykut Ozkul<sup>8</sup>, Cansu Gurcan<sup>1,5</sup>, Oguzhan Panatli<sup>5</sup>, Gokce Yagmur Summak<sup>1</sup>, Cemile Gokce<sup>5</sup>, Marco Orecchioni<sup>9</sup>, Arianna Gazzi<sup>3,10</sup>, Flavia Vitale<sup>11</sup>, Julia Somers<sup>12</sup>, Emek Demir<sup>12</sup>, Serap Suzuk Yildiz<sup>2</sup>, Hasan Nazir<sup>13</sup>, Jean-Charles Grivel<sup>14</sup>, Davide Bedognetti<sup>4,15,16</sup>, Andrea Crisanti<sup>17</sup>, Kamil Can Akcali<sup>1,18</sup>, Yury Gogotsi<sup>5\*</sup>, Lucia Gemma Delogu<sup>3\*</sup>, Açelya Yilmazer<sup>1,3\*</sup>

<sup>1</sup> Stem Cell Institute, Ankara University, Balgat, Ankara, Turkey

<sup>2</sup> Ministry of Health General Directorate of Public Health, Microbiology References Laboratory, Ankara, Turkey

<sup>3</sup> Department of Biomedical Sciences, University of Padua, Padua, Italy

<sup>4</sup> Cancer Research Department, Sidra Medicine, Doha, Qatar

<sup>5</sup> Department of Biomedical Engineering, Ankara University, Golbasi, Ankara, Turkey

<sup>6</sup> A.J. Drexel Nanomaterials Institute and Department of Materials Science and Engineering, Drexel University, Philadelphia, Pennsylvania, USA

<sup>7</sup> Department of Biology, Gazi University, Ankara, Turkey

<sup>8</sup> Department of Virology, Faculty of Veterinary Medicine, Ankara University, Ankara, Turkey

<sup>9</sup> La Jolla Institute for Immunology, La Jolla, CA, USA

<sup>10</sup> Department of Chemical and Pharmaceutical Sciences, University of Trieste, Trieste, Italy

<sup>11</sup> Department of Neurology, Bioengineering, Physical Medicine & Rehabilitation, Center for Neuroengineering and Therapeutics, University of Pennsylvania, Philadelphia, Pennsylvania, USA

<sup>12</sup> Oregon Health & Sciences University, Department of Molecular and Medical Genetics, Portland, Oregon, USA

<sup>13</sup> Department of Chemistry, Ankara University, Tandogan, Ankara, Turkey

<sup>14</sup> Deep Phenotyping Core, Sidra Medicine, Doha, Qatar

<sup>15</sup> Department of Internal Medicine and Medical Specialties (DiMI), University of Genoa, Genoa, Italy

<sup>16</sup> College of Health and Life Sciences, Hamad Bin Khalifa University, Doha, Qatar

<sup>17</sup> Department of Molecular Medicine, Padua University Hospital, Padua, Italy

<sup>18</sup> Department of Biophysics, Faculty of Medicine, Ankara University, Ankara, Turkey

# equal contribution

\* corresponding authors:

[ayilmazer@ankara.edu.tr](mailto:ayilmazer@ankara.edu.tr), [luciagemma.delogu@unipd.it](mailto:luciagemma.delogu@unipd.it), [gogotsi@drexel.edu](mailto:gogotsi@drexel.edu)

## **Content:**

1. Material and methods
2. Supplementary Figure legends
3. References

## **1. Materials and methods**

### **MAX Precursor Synthesis**

To prepare the MAX precursors, TiC (<2  $\mu\text{m}$ , Alfa Aesar, 99.5%), Mo (-250 mesh, Alfa Aesar, 99.9%), Ta (-325 mesh, Alfa Aesar, 99.97%), Nb (-325 mesh, Beantown Chemicals, 99.99%), Ti (-325 mesh, Alfa Aesar, 99.5%), Al (-325 mesh, Alfa Aesar, 99.5%), and graphite (-325 mesh, Alfa Aesar, 99%) powders were utilized. For  $\text{Ti}_3\text{AlC}_2$ , a 2:1:1 atomic ratio of TiC:Ti:Al (50 g) was mixed. To produce  $\text{Mo}_2\text{Ti}_2\text{AlC}_3$ , a 2:2:1.3:2.7 atomic ratio (10 g) of Mo:Ti:Al:C powders were mixed. To synthesize  $\text{Ta}_4\text{AlC}_3$ , a 4:1:3 atomic ratio (7 g) of Ta:Al:C powders were utilized. For  $\text{Nb}_4\text{AlC}_3$ , a 4:1.1:2.7 atomic ratio (10 g) of Nb:Al:C was used. All aforementioned mixtures were mixed in a 2:1 ball:powder weight ratio using 5 mm alumina balls. The mixtures were ball milled at 60 rpm for 24 hours prior to synthesis.

The high-temperature annealing reactions were conducted in a Carbolite furnace, using heating and cooling rates of 3  $^\circ\text{C}$ , along with 200  $\text{cm}^3 \text{min}^{-1}$  flow of ultra-high purity Ar (99.999%). To synthesize  $\text{Ti}_3\text{AlC}_2$ , the mixture was heated to 1400  $^\circ\text{C}$  for 2 h. For  $\text{Mo}_2\text{Ti}_2\text{AlC}_3$ , the powders were heated to 1600  $^\circ\text{C}$  for 4 h. To produce  $\text{Ta}_4\text{AlC}_3$ , the powders were heated to 1400  $^\circ\text{C}$  for 8 h. And for  $\text{Nb}_4\text{AlC}_3$ , the mixture was heated to 1650  $^\circ\text{C}$  for 4 h. After cooling, the sintered blocks were milled using a TiN-coated bit and sieved through a 400 mesh sieve, resulting in a final particle size <38

$\mu\text{m}$ . All experiments conducted in this study used a single batch of MAX to eliminate any artifacts from variation between MAX synthesis batches.

### **MXene Synthesis**

To selectively etch Al from the MAX phases to produce MXenes, HF (Acros Organics, 48-50 wt. %; 29 M), HCl (Fisher Scientific, 37 wt. %; 12 M), and deionized (DI) water (15 M $\Omega$  resistivity) was utilized. For the synthesis of all MXenes in this study, Teflon coated stir bars were utilized with at 300 rpm stirring rate.  $\text{Ti}_3\text{C}_2\text{T}_x$  was synthesized by etching 1.0 g  $\text{Ti}_3\text{AlC}_2$  in a 1:3:6 volumetric ratio (20 mL total) of HF:H<sub>2</sub>O:HCl for 24 hours at 35 °C. To produce  $\text{Mo}_2\text{Ti}_2\text{C}_3\text{T}_x$ , 1.0 g  $\text{Mo}_2\text{Ti}_2\text{AlC}_3$  was added to 20 mL 48-50 wt.% HF for 96 hours at 55 °C. To synthesize  $\text{Ta}_4\text{C}_3\text{T}_x$ , 1.0 g  $\text{Ta}_4\text{AlC}_3$  was added to 20 mL 48-50 wt.% HF for 72 hours at 35 °C.  $\text{Nb}_4\text{C}_3\text{T}_x$  was produced by adding 1.0 g of  $\text{Nb}_4\text{AlC}_3$  to 20 mL 48-50 wt.% HF and stirred for 120 hours at 35 °C. After the appropriate etching time, the MXenes were washed by centrifugation using DI water. Briefly, the mixtures were added to 150 mL DI H<sub>2</sub>O, then centrifuged at 3,500 rpm for 10 min. The acidic supernatant (clear) was decanted; the multilayer MXene remained as sediment. New DI H<sub>2</sub>O was added, the sediment redispersed, and the process repeated. These cycles were repeated eight times to ensure that all residual acid was removed from the multilayer MXene.

To delaminate the MXenes, and produce a stable colloidal solution, the multilayer MXenes were added to 20 mL of a 5 wt. % TMAOH solution (TMAOH; Sigma Aldrich, 25 wt. % in H<sub>2</sub>O). The MXenes were stirred for 12 h at 300 rpm at 35 °C. Afterwards, the mixtures were placed into 50 mL centrifugation tubes. DI water was added, and the samples were centrifuged at 10,000 rpm for 20 min. The supernatant (clear) was decanted, with the MXenes redispersed in fresh DI water. This process was

repeated five times to ensure that all excess TMAOH was removed. After the final cycle, the MXenes were fully redispersed in 50 mL DI water, then centrifuged at 3,500 rpm for 10 minutes. The supernatant (dark) was carefully collected, then centrifuged again at 3,500 rpm for 10 min, the supernatant (dark) was collected for use. This procedure ensured that only single-flake MXene remained in the solution. A known volume of this solution was vacuum filtered on Celgard membranes (64 nm pore size, 3501 coated polypropylene), to produce free-standing films for X-ray diffraction (XRD). By measuring the weight of the produced films, the colloidal solution concentration was determined.

### **Material Characterization**

XRD patterns of the powders and films were collected on a Rigaku MiniFlex600 (40 kV and 15 mA) diffractometer using Cu K $\alpha$  radiation. The conditions were as follows: (i) for the MAX powder, step scan 0.02, 3–80 ( $2\theta$ ), step time of 1 s; (ii) for the MXene films, a step scan of 0.03, 3–70 ( $2\theta$ ), step time of 0.5 s was used.

Scanning electron microscopy (SEM) was conducted on a dual-beam focused ion beam (Strata DB235, FEI). The MXene flakes were drop-cast onto an anodized alumina substrate. Pt was deposited onto the flake and substrate to minimize charging. DLS (Zetasizer Nano ZS, Malvern Instruments) was performed to analyze MXene flake size distribution. Three measurements were taken of each sample and the average value was reported.

## **Cell Culture**

Jurkat cells were grown in 75 cm<sup>2</sup> flasks at 37 °C, 5% CO<sub>2</sub>, in DMEM medium (Invitrogen, CA, USA) containing 10% FBS (Invitrogen, CA, USA), and 1% P/S (Invitrogen, CA, USA). The day before exposure to particles, cells were seeded at 10<sup>5</sup> cells/well in 24-well plates. Vero E6 cells were cultured in high-glucose DMEM medium (Invitrogen, CA, USA) containing 10% FBS (Invitrogen, CA, USA), and 1% P/S (Invitrogen, CA, USA). Cells were maintained at 37 °C, 5% CO<sub>2</sub>. For viral infection experiments, African green monkey kidney Vero E6 cell line was purchased from ATCC and maintained in DMEM media containing 10% FBS and 1% antibiotics. Four local SARS-CoV-2 isolates were used in this study and genotype details including GISAID classifications are given in **Figure 2B**. Viral particles were propagated in Vero E6 cells. All virus-related experiments were performed at Biosafety Level 3 laboratories.

## **Isolation of PBMCs**

PBMCs were harvested from ethylenediaminetetraacetic acid (EDTA)-venous blood from informed healthy donors (25–50 years old) using a Ficoll-Paque (GE Healthcare, CA, USA) standard separation protocol. Informed signed consent was obtained from all the donors. Cell separation and experiments were performed immediately after the blood draw. PBMCs were cultured in 24-well plates in RPMI 1640 medium (Invitrogen, CA, USA), supplemented with 10% heat-inactivated FBS (Invitrogen, CA, USA), 1% P/S (Life Technologies), 1% L-Glutamine (Life Technologies). In addition, EtOH 70% was used as positive control for cell death, while 2 µg/ml LPS (Life Technologies) or 10 µg/ml ConA (Life Technologies) were used as positive control for cell activation.

## **Flow Cytometer Analysis**

Cells were seeded at  $10^6$  cells/well in 24-well plates, and the day before the experiment cells were exposed to 50  $\mu\text{g}/\text{mL}$   $\text{Ti}_3\text{C}_2\text{T}_x$ . Cell viability was assessed by means of staining with Fixable Viability Stain 780 (BD Biosciences). EtOH 70% was used as positive control.

To assess PBMC activation after treatment with  $\text{Ti}_3\text{C}_2\text{T}_x$ , CD25, CD69, and HLA-DR (PE-conjugated anti-CD25, M-A251 clone; PE-Cy7-conjugated anti-CD69, FN50 clone, BV421-conjugated anti-HLA-DR, G46-6 clone; BD Bioscience) were used as activation markers. Lypopolisaccharides (LPS, 2  $\mu\text{g}/\text{mL}$ , Life Technologies) or concanavalin A (ConA, 10  $\mu\text{g}/\text{mL}$ , Life Technologies) were used as positive control for cell activation in monocytes and T cells, respectively. Staining was performed in the dark for 20 min. Cells were processed by flow cytometry (BD LSRFortessa™ FACS Canto II, BD Bioscience), and data were analyzed by FlowJo™ Software[1].

## **PBMC staining and gating strategy by flow cytometry**

PBMCs were stained with FITC-conjugated anti-CD3 (UCHT1 clone; BD Biosciences), BV605-conjugated anti-CD4 (RPA-T4 clone; BD Biosciences), BV786-conjugated anti-CD14 (M5E2 clone; BD Biosciences), and BV711-conjugated anti-CD16 (3G8 clone; BD Biosciences).

Gating strategy was performed as described in Figure S6E. Briefly, doublets and cell debris were excluded through the gating strategy and specific subpopulations were determined. Specifically: CD4 T cells ( $\text{CD}3^+ \text{CD}4^+$ ), CD8 T cells ( $\text{CD}3^+ \text{CD}4^-$ ), Classical (C.) monocytes ( $\text{CD}3^- \text{CD}14^+ \text{CD}16^-$ ), Intermediate (Int.) monocytes ( $\text{CD}3^- \text{CD}14^+ \text{CD}16^+$ ), Non-classical (N.C.) monocytes ( $\text{CD}3^- \text{CD}14^- \text{CD}16^+$ ).

### **Single-cell mass cytometry analysis**

Single-cell mass cytometry analysis was performed on isolated PBMCs, collected as described above, seeded at a concentration of  $4 \times 10^6$  cells/well in 6-well plates. PBMCs were incubated with 50  $\mu\text{g}/\text{mL}$  of  $\text{Ti}_3\text{C}_2\text{T}_x$  for 24 h or left untreated (negative control). LPS at 0.5  $\mu\text{g}/\text{mL}$  (Sigma – Aldrich, Missouri, USA) and EtOH 70% were used as positive controls. Six hours prior to the treatment end, cells were co-incubated with 10  $\mu\text{g}/\text{mL}$  Brefeldin A (Invitrogen, CA, USA). After the incubation, PBMCs were washed with PBS supplemented with 0.5 M EDTA and 5% Fetal Calf Serum (FCS).

Cells were then barcoded using Cell-ID 20-Plex Pd Barcoding Kit (Fluidigm, CA, USA). The barcoded samples were stained with Cell-ID Cisplatin (1:1000, Fluidigm, CA, USA), Maxpar Human Peripheral Blood Phenotyping and Human Intracellular Cytokine I Panel Kits (Fluidigm, CA, USA) following the manufacturer instructions. To this end, cells were fixed and permeabilized with 1X Fix I Buffer and 1X Barcode Perm Buffer obtaining a uniform cell labeling with the palladium barcode. Thanks to the barcoding process, samples were pooled together and re-suspended into a 5 ml polystyrene round-bottom tube using the Maxpar Cell Staining Buffer.

The surface marker antibody mix (1:100 dilutions for each antibody) was added to the sample. Cells were then carefully mixed and incubated for 30 min at room temperature. At the end of the incubation, samples were washed twice with Maxpar Cell Staining Buffer, and fixed by incubation with 1.6% paraformaldehyde for 10 min. After this, cells were washed twice with Maxpar Perm-S Buffer, centrifuged for 10 min at  $1000\times g$ , resuspended in 400  $\mu\text{l}$  of Maxpar Perm-S Buffer, and incubated with cytoplasmic/secreted antibody mix for 30 min (1:100 dilutions for each antibody). Following the incubation, cells were washed twice with Maxpar Cell Staining Buffer, and stained overnight using 0.125  $\mu\text{M}$  Cell-ID Intercalator-Ir solution. The day after,

samples were washed twice with Maxpar Cell Staining Buffer, re-suspended with 2 ml of Maxpar water, and filtered before data acquisition using a 0.22  $\mu\text{m}$  cell strainer cap to remove possible cell clusters or aggregates. Data were analyzed using mass cytometry platform CyTOF2 (Fluidigm Corporation, CA, USA).

CyTOF data analysis was performed as described before [2, 3]. Briefly, background was subtracted and FCS files were normalized and analyzed by Cytobank. Doublets, cell debris, and dead cells were excluded through the gating strategy using Cell-ID Intercalator-Ir and LD. PBMCs subsets and specific subpopulations were determined as portrayed in Figure 1E. Specifically: T cells (CD45<sup>+</sup> CD19<sup>-</sup> CD3<sup>+</sup>), Naïve Th. Cells (CD3<sup>+</sup> CD4<sup>+</sup> CD45RA<sup>+</sup> CD27<sup>+</sup> CD38<sup>-</sup> HLADR<sup>-</sup>), Effector Th. cells (CD3<sup>+</sup> CD4<sup>+</sup> CD45RA<sup>+</sup> CD27<sup>-</sup> CD38<sup>-</sup> HLADR<sup>-</sup>), Activated Th. cells (CD3<sup>+</sup> CD4<sup>+</sup> CD38<sup>+</sup> HLADR<sup>+</sup>), Naïve CT cells (CD3<sup>+</sup> CD8<sup>+</sup> CD45RA<sup>+</sup> CD27<sup>+</sup> CD38<sup>-</sup> HLADR<sup>-</sup>), Effector CT cells (CD3<sup>+</sup> CD8<sup>+</sup> CD45RA<sup>+</sup> CD27<sup>-</sup> CD38<sup>-</sup> HLADR<sup>-</sup>), Activated CT cells (CD3<sup>+</sup> CD8<sup>+</sup> CD38<sup>+</sup> HLADR<sup>+</sup>), C. monocytes (CD45<sup>+</sup> CD3<sup>-</sup> CD19<sup>-</sup> CD20<sup>-</sup> HLADR<sup>+</sup> CD14<sup>+</sup>), int. monocytes (CD45<sup>+</sup> CD3<sup>-</sup> CD19<sup>-</sup> CD20<sup>-</sup> HLADR<sup>+</sup> CD14<sup>dim</sup> CD16<sup>+</sup>), N.C. monocytes (CD45<sup>+</sup> CD3<sup>-</sup> CD19<sup>-</sup> CD20<sup>-</sup> CD11c<sup>-</sup> CD14<sup>-</sup> CD16<sup>+</sup>), mDCs (CD45<sup>+</sup> CD3<sup>-</sup> CD19<sup>-</sup> CD20<sup>-</sup> CD14<sup>-</sup> HLA<sup>-</sup> DR<sup>+</sup> CD11c<sup>+</sup> CD123<sup>-</sup>), pDCs (CD45<sup>+</sup> CD3<sup>-</sup> CD19<sup>-</sup> CD20<sup>-</sup> CD14<sup>-</sup> CD11c<sup>-</sup> HLADR<sup>+</sup> CD123<sup>+</sup>), NK cells (CD45<sup>+</sup> CD3<sup>-</sup> CD19<sup>-</sup> CD20<sup>-</sup> CD14<sup>-</sup> CD11c<sup>-</sup> CD38<sup>+</sup> CD16<sup>+</sup>), B cells (CD3<sup>-</sup> CD20<sup>+</sup> CD19<sup>+</sup>), naïve B cells (CD27<sup>-</sup>), plasma B cells (HLADR<sup>-</sup> CD38<sup>+</sup>). The heat map visualization created with Cytobank, allowed the comparison between the marker fluorescence of the treated populations with mean fluorescent intensity towards the untreated control. Moreover, viSNE, a Cytobank tool implemented for cytometry analysis was employed. The t-stochastic neighbor embedding (t-SNE) shows single cells in a two- or three-dimensional plot, on the basis of their relationships. In order to



characterize the viSNE map, 10 cell surface markers were used (i.e. CD3, CD4, CD8a, CD11c, CD14, CD16, CD19, CD20, CD123, and HLA-DR).

Cytokine data were analyzed using the viSNE tool, and displayed as plots of the expression intensity of the studied cytokines (i.e., IL-6, TNF- $\alpha$ , IL-17a, IL17f, IFN- $\gamma$ , Perforin, and GrB), and heatmaps of mean marker expression ratio for cytokines that displayed modulations upon Ti<sub>3</sub>C<sub>2</sub>T<sub>x</sub> treatment.

The specific clone of each antibody used for mass cytometry has been provided in Table S3.

### **Detection of TNF $\alpha$**

TNF- $\alpha$  levels were evaluated in the supernatant of PBMCs treated with Ti<sub>3</sub>C<sub>2</sub>T<sub>x</sub> (50  $\mu$ g mL<sup>-1</sup>) for 24h, or lipopolysaccharide (LPS, a strong immunostimulatory molecule) plus Ti<sub>3</sub>C<sub>2</sub>T<sub>x</sub>, LPS alone, cell control samples were left untreated. The Cytometric Bead Array (CBA) immunoassay kit (BD Biosciences, USA) was used to quantify TNF- $\alpha$  concentration following the manufacturer instructions. Data were acquired in a BD LRS Fortessa flow cytometry system (BD Biosciences, San Jose, CA, USA) and analyses performed using BD FCAP Array v3.0 software (BD Biosciences, San Jose, CA, USA). The standard curve was determined using a five-parameter logistic (5-PL) equation. The results were based on standard concentration curve and expressed as picogram per milliliter (pg/mL).

### **Luminex analysis**

To evaluate the impact of MXenes on cytokine release by PBMCs, cells were incubated for 24 h with 50  $\mu$ g/mL of Ti<sub>3</sub>C<sub>2</sub>T<sub>x</sub>. ConA, 4  $\mu$ g/mL (Sigma) and LPS, 2  $\mu$ g/mL (Sigma) were used as positive controls, while samples incubated with medium

alone were used as negative controls. Supernatants were collected and analysed by Luminex technology using Bio-Plex Pro Human Chemokine 40-plex Panel (Bio-Rad) to measure C-C Motif Chemokine Ligand (CCL) 21 (CCL21), chemokine (C-X-C motif) ligand (CXCL) 13 (CXCL13), CCL27, CXCL5, CCL11, CCL24, CCL26, C-X3-C Motif Chemokine Ligand 1 (CX3CL1), CXCL6, granulocyte macrophage-colony stimulating factor (GM-CSF), CXCL1, CXCL2, CCL1, interferon gamma (IFN- $\gamma$ ), interleukin (IL)-1 $\beta$ , IL-2, IL-4, IL-6, CXCL8, IL-10, IL-16, CXCL10, CXCL11, CCL2, CCL8, CCL7, CCL13, CCL22, macrophage migration inhibitory factor (MIF), CXCL9, CCL3, CCL15, CCL20, CCL19, CCL23, CXCL16, CXCL12, CCL17, CCL25 and tumor necrosis factor (TNF)- $\alpha$ . 5-parameter-Logistic regressions with a power low variance weighing were calculated for each cytokine standard with a recovery range of 70-130% using Bioplex Manager V6.2 (BioRad). Concentration falling within the recovery range, expressed in pg/ml were extrapolated from the median fluorescence intensity of each cytokine bead set. For analytes above or below the standard recovery ranges, upper and lower limits of quantification computed from the standard curves were substituted. Data were then Log<sub>2</sub> transformed and compared across experiments by fitting a general ANOVA model with contrast between groups; *p* values were corrected using Benjamini and Hochberg false discovery rate, FDR; statistically significant *p* value cut-off was set at FDR *p* < 0.05.

### **Molecular Docking**

Water and ligand molecules were removed from protein structures using UCSF Chimera Software Version 1.14[4]. All protein structures were downloaded from the Protein Data Bank. Protein models and Ti<sub>3</sub>C<sub>2</sub>T<sub>x</sub> ligand were converted to PDBQT file format using parameters defined by default in the AUTODOCK 4.0[5] program, and

blind docking calculations were made for each protein by defining grid box maximum and grid space 1 Å. Since all conformations are very close to each other ( $\pm 0.01$  kcal / mol), the first conformation was taken as basis in all analyzes. Discovery Studio's academic version was used for the preparation of the visuals of the calculations and additional calculations[6].

### **Viral Infection**

Vero E6 cells were seeded onto 96-well plates at confluency. Cells were incubated with MXenes (at different dilutions from a stock solution of 1.1 mg/mL) and SARS-CoV-2 (MOI 0.1). Cell viability was obtained after 48 h by using crystal violet staining. Briefly, cells were first incubated in 10% formaldehyde. Following this decontamination, plates were washed under running water and stained with Crystal Violet (Sigma) for 20 min. EtOH was added in order to solubilize the stain and absorbance values were obtained at 495 nm wavelength. Percentage of cell viability was obtained following normalization against untreated control cells.

### **qRT-PCR analysis**

Following treatment, cell culture supernatants were removed and RNA was isolated via MPLC Total Nucleic Acid Isolation Kit (Roche) using automated MagNA Pure LC Instrument (Roche). One-step qRT-PCR was performed using the Transcriptor One-Step RT-PCR Kit (Roche). A standard curve was constructed in order to calculate viral copies per  $\mu$ L. **Primer sequences (2019-nCoV\_N1) were obtained from the Division of Viral Diseases, National Center for Immunization and Respiratory Diseases, Centers for Disease Control and Prevention, Atlanta, GA, USA.**

### **LC-MS/MS Analysis**

Vero E6 cells were incubated with  $Ti_3C_2T_x$  (50  $\mu\text{g}/\text{mL}$ ) in 6 well-plates for 24 h. Subsequently, cells were washed with cold PBS and cell pellets were obtained. Total protein concentration was obtained using BCA assay (Thermo). LC-MS/MS analysis was performed at the proteomic facility of Acibadem Labmed (Turkey). Protein profiling was performed using nano Acquity ultra performance liquid chromatography coupled with LC-MS/MS system on Synapt instrument (Waters) as described before[7, 8].

### **Functional Annotation**

For the analyses the proteins with  $p < 0.05$  and fold change (FC)  $\geq 1$  based on  $\log_2$  expression value were assigned as differentially expressed. Gene Ontology (GO) is used to annotate the proteins[9]. The three sub-ontologies of biological process (BP), cellular component (CC), and molecular function (MF) were identified. To obtain a comprehensive functional annotation, different databases were searched. The ontology enrichment and pathway analyses were performed using the DAVID database[10]. Metabolic pathways based on available databases such as KEGG[11] and Reactome[12] were also used to describe the pathway enrichment analyses. The protein-protein interactions network was predicted via String database[13]. The interaction score was set to  $\geq 0.4$ , and the PPI (Protein-Protein Interaction) networks were created. BiomaRt R package was used to combine the datasets[14].

### **Statistical Analysis**

All values are expressed as mean  $\pm$  ST.D. Comparison between groups was performed by one-way ANOVA, followed by a Tukey's post hoc multiple comparisons where data

were normally distributed. At least three independent samples were analyzed. A value of  $p < 0.05$  was considered significant.

## 2. Supplementary Figures

### **Figure S1. Evaluation of the effect of $Ti_3C_2T_x$ on SARS-CoV-2 infection *in silico*.**

*In silico* molecular docking analysis of  $Ti_3C_2T_x$  against different viral protein domains (6VWW, 6LU7, 6M0J, 6M03, 6VXX and 6VYB) was performed and types of interactions and amino acid residues involved during these interactions were identified.

**Figure S2. Functional annotation of  $Ti_3C_2T_x$  treated Vero E6 cells.** Vero E6 cells were treated with  $Ti_3C_2T_x$  (50  $\mu$ g/ml for 4 h) and cellular total proteins were isolated for LC-MS/MS analysis. GO annotation was performed for **A**) biological process (BP) and **B**) molecular function (MF).

**Supplementary Figure 3. Full reactome of  $Ti_3C_2T_x$  treated cells.** Vero E6 cells were treated with  $Ti_3C_2T_x$  and cellular total proteins were isolated for LC-MS/MS analysis. Genome-wide overview of the Reactome pathway analysis was performed and the whole reactome image is represented. Scale bar represents p value from 0 to 0.05.

### **Supplementary Figure 4. Functional annotation of $Ti_3C_2T_x$ treated Vero E6 cells.**

Vero E6 cells were treated with  $Ti_3C_2T_x$  and cellular total proteins were isolated for LC-MS/MS analysis. Network analysis was performed in order to dissect the functional protein associations by the String program for the significantly overlapping proteins

with the SARS-CoV-2 protein interaction map reported in the study by Gordon et al [15]. The jointed lines represent the predicted protein-protein connections and correlations among the network. Differentially expressed proteins of  $Ti_3C_2T_x$  treatment shows numerous connections between the proteins.

**Figure S5. Viability on Jurkat cells and gating strategy on peripheral blood mononuclear cells.** Flow cytometry analysis on Jurkat cells and PBMCs. Jurkat cells were treated with 12.5, 25 and 50  $\mu\text{g/ml}$  of  $Ti_3C_2T_x$ , while PBMCs were treated with the selected concentration of 50  $\mu\text{g/mL}$  of  $Ti_3C_2T_x$  for 24 h or left untreated (Unt). EtOH 70% was used as a positive control to induce cell death. LPS (2  $\mu\text{g/mL}$ ) and ConA (10  $\mu\text{g/mL}$ ) were used as positive controls for cell differentiation analysis. **A)** Jurkat cells were stained with Live/Dead staining and cell death was evaluated and expressed as percentage of total cell number. **B)** Representative flow cytometric dot plot of Jurkat cells. **C)** Histogram plots showing live and dead Jurkat cells. **D)** Pseudocolor plot showing the gating strategy applied to flow cytometry analyses of PBMCs. **E)** Representative flow cytometric dot plot of PBMCs untreated (Unt) or treated with: EtOH 70%, LPS (2  $\mu\text{g/mL}$ ), ConA (10  $\mu\text{g/mL}$ ), or  $Ti_3C_2T_x$  (50  $\mu\text{g/mL}$ ). Data are presented as mean  $\pm$  ST.D. of three independent samples.

**Figure S6. Viability of PBMCs and monocytes.** Cell viability and activation staining analysis by flow cytometry and CyTOF. Cells were treated with  $Ti_3C_2T_x$  (50  $\mu\text{g/mL}$ ) for 24 h or left untreated (Unt). EtOH 70% was used as a positive control to induce cell death. Cells were stained with Fixable Viability Staining 780 to evaluate necrosis. **A)** Representative flow cytometric analysis for cell viability staining of PBMCs. **B)** Bar graph of cisplatin (LD) mean marker expression ratio for all CD45+ PBMCs. **C)** Bar

graph of cisplatin (LD) mean marker expression ratio for all T cell, monocyte, DC, NK, and B cell subpopulations. Heatmaps and viSNE plots were generated on the concatenated files. Data are presented as mean  $\pm$  ST.D. of three independent samples. **D)** Representative flow cytometric analysis (left panel) and histogram plot (right panel) for cell viability staining of CD4 T cells. **E)** Representative flow cytometric analysis (left panel) and histogram plot (right panel) for cell viability staining of CD8 T cells. **F)** Representative flow cytometric analysis for cell viability staining of monocytes. **G)** Representative flow cytometric analysis (left panel) and histogram plot (right panel) for cell viability staining of C. monocytes. **H)** Representative flow cytometric analysis (left panel) and histogram plot (right panel) for cell viability staining of Int. monocytes. **I)** Representative flow cytometric analysis (left panel) and histogram plot (right panel) for cell viability staining of N.C. monocytes. Data are presented as mean  $\pm$  ST.D. of three independent samples.

**Figure S7. Analysis of activation on peripheral blood mononuclear cells and monocytes.** Cell activation staining analysis by flow cytometry. Cells were treated with 50  $\mu$ g/ml  $Ti_3C_2T_x$  for 24h or left untreated (Unt). LPS 2  $\mu$ g/ml was used as a positive control for PBMCs while ConA 10  $\mu$ g/ml was used as positive control for T cells. To evaluate cell activation, PBMCs and monocytes were stained with CD25-PE and CD69-PE-Cy7 **A)** Representative flow cytometric analysis for cell activation staining of PBMCs. **B)** Representative flow cytometric analysis (left panel) and histogram plot (right panel) for cell activation staining of CD4 T cells. **C)** Representative flow cytometric analysis (left panel) and histogram plot (right panel) for cell activation staining of CD8 T cells. **D)** Representative flow cytometric analysis (left panel) and histogram plot (right panel) for cell activation staining of monocytes. **E)** Representative

flow cytometric analysis (left panel) and histogram plot (right panel) for cell activation staining of C. monocytes. **F)** Representative flow cytometric analysis (left panel) and histogram plot (right panel) for cell activation staining of Int. monocytes. **G)** Representative flow cytometric analysis (left panel) and histogram plot (right panel) for cell activation staining of N.C. monocytes. **H)** Representative flow cytometric analysis for CD25-PE staining in PBMCs treated with 50  $\mu\text{g}/\text{mL}$  of  $\text{Ti}_3\text{C}_2\text{T}_x$ . Cell activation was expressed as % of positive cells. **I)**  $\text{TNF-}\alpha$  concentration measured in the supernatant of PBMCs treated with  $\text{Ti}_3\text{C}_2\text{T}_x$  (50  $\mu\text{g}/\text{mL}$ ) using BD Cytometric Bead Array (CBA) Kit. Data are presented as mean  $\pm$  SD of three independent samples. \*,  $p < 0.05$ ; \*\*,  $p < 0.01$ ; \*\*\*,  $p < 0.001$ ; \*\*\*\*  $p < 0.0001$  (Ordinary one-way ANOVA).

**Figure S8. Analysis of HLA-DR on peripheral blood mononuclear cells and monocytes.** HLA-DR staining analysis by flow cytometry. Cells were treated with 50  $\mu\text{g}/\text{ml}$   $\text{Ti}_3\text{C}_2\text{T}_x$  for 24h or left untreated (Unt). LPS 2  $\mu\text{g}/\text{ml}$  and ConA 10  $\mu\text{g}/\text{ml}$  were used as positive control. **A)** PBMCs were stained with BV421-HLA-DR, and HLA-DR expression was evaluated in PBMCs, CD4 T cells, and CD8 T cells. Results are expressed as percentage of total cell number. **B)** Representative flow cytometric analysis for HLA-DR staining of PBMCs, CD4 T cells, and CD8 T cells. **C)** Histogram plots showing HLA-DR staining of PBMCs, CD4 T cells, and CD8 T cells. **D)** Monocytes were stained with BV421 HLA-DR and HLA-DR expression was evaluated in monocytes as well in monocyte subpopulations (i.e., C. monocytes, Int. monocytes and N.C. monocytes). Results are expressed as percentage of total cell number. **E)** Representative flow cytometric analysis for HLA-DR staining of monocytes and monocyte subpopulations (i.e., C. monocytes, Int. monocytes and N.C. monocytes).



F) Histogram plots showing HLA-DR staining of monocytes and monocyte subpopulations (i.e., C. monocytes, Int. monocytes and N.C. monocytes).

**Figure S9.  $Ti_3C_2T_x$  impact on peripheral blood mononuclear cell subpopulations at single-cell level.** Blood from healthy donors was drawn, and PBMCs were isolated and incubated with 50  $\mu\text{g/ml}$   $Ti_3C_2T_x$  for 24h and stained for mass cytometry analysis. LPS 2  $\mu\text{g/ml}$  was used as a positive control. **A-G)** Bar graphs reporting the immune response to  $Ti_3C_2T_x$  of three biological replicates for **A)** IL-6, **B)** TNF- $\alpha$ , **C)** IFN- $\gamma$ , **D)** Perforin, **E)** GrB, **F)** IL-17a, and **G)** IL-17f and immune subpopulations identified. Data are presented as mean  $\pm$  ST.D. of three independent samples. Statistical differences: \* $p < 0.05$ ; \*\* $p < 0.01$ ; \*\*\* $p < 0.001$  (One-way ANOVA and Tukey's multiple comparison test).

**Figure S10. Immune cell subpopulations gating strategy.** Dot plots showing the gating strategy used for the identification of the different immune cell subpopulations by CyTOF.

## References

- [1] Becton, Dickinson and Company, Ashland, OR 2019.
- [2] M. Orecchioni, D. Bedognetti, L. Newman, C. Fuoco, F. Spada, W. Hendrickx, F.M. Marincola, F. Sgarrella, A.F. Rodrigues, C. Menard-Moyon, G. Cesareni, K. Kostarelos, A. Bianco, L.G. Delogu, Single-cell mass cytometry and transcriptome profiling reveal the impact of graphene on human immune cells, Nat. Commun., 8 (2017) 1109.

- [3] S.C. Bendall, E.F. Simonds, P. Qiu, A.D. Amir el, P.O. Krutzik, R. Finck, R.V. Bruggner, R. Melamed, A. Trejo, O.I. Ornatsky, R.S. Balderas, S.K. Plevritis, K. Sachs, D. Pe'er, S.D. Tanner, G.P. Nolan, Single-cell mass cytometry of differential immune and drug responses across a human hematopoietic continuum, *Science*, 332 (2011) 687-696.
- [4] E.F. Pettersen, T.D. Goddard, C.C. Huang, G.S. Couch, D.M. Greenblatt, E.C. Meng, T.E. Ferrin, UCSF Chimera-a visualization system for exploratory research and analysis, *J. Comput. Chem.*, 25 (2004) 1605-1612.
- [5] G.M. Morris, R. Huey, W. Lindstrom, M.F. Sanner, R.K. Belew, D.S. Goodsell, A.J. Olson, AutoDock4 and AutoDockTools4: Automated docking with selective receptor flexibility, *J. Comput. Chem.*, 30 (2009) 2785-2791.
- [6] 2016.
- [7] H. Taheri, M.A. Unal, M. Sevim, C. Gurcan, O. Ekim, A. Ceylan, Z. Syrgiannis, K.C. Christoforidis, S. Bosi, O. Ozgenç, M.J. Gómez, M. Turktas Erken, Ç. Soydal, Z. Eroğlu, C.V. Bitirim, U. Cagin, F. Arı, A. Ozen, O. Kuçuk, L.G. Delogu, M. Prato, Ö. Metin, A. Yilmazer, Photocatalytically active graphitic carbon nitride as an effective and safe 2D material for in vitro and in vivo photodynamic therapy, *Small*, 16 (2020) 1904619.
- [8] W. Zhu, R. Michalsky, Ö. Metin, H. Lv, S. Guo, C.J. Wright, X. Sun, A.A. Peterson, S. Sun, Monodisperse Au nanoparticles for selective electrocatalytic reduction of CO<sub>2</sub> to CO, *J. Am. Chem. Soc.*, 135 (2013) 16833-16836.
- [9] M. Ashburner, C.A. Ball, J.A. Blake, D. Botstein, H. Butler, J.M. Cherry, A.P. Davis, K. Dolinski, S.S. Dwight, J.T. Eppig, M.A. Harris, D.P. Hill, L. Issel-Tarver, A. Kasarskis, S. Lewis, J.C. Matese, J.E. Richardson, M. Ringwald, G.M. Rubin, G.

Sherlock, Gene ontology: tool for the unification of biology. The Gene Ontology Consortium, *Nat. Genet.*, 25 (2000) 25-29.

[10] G. Dennis, B.T. Sherman, D.A. Hosack, J. Yang, W. Gao, H.C. Lane, R.A. Lempicki, DAVID: Database for annotation, visualization, and integrated discovery, *Genome Biol*, 4 (2003).

[11] M. Kanehisa, S. Goto, S. Kawashima, Y. Okuno, M. Hattori, The KEGG resource for deciphering the genome, *Nucleic Acids Res.*, 32 (2004) D277-D280.

[12] G. Joshi-Tope, M. Gillespie, I. Vastrik, P. D'Eustachio, E. Schmidt, B. de Bono, B. Jassal, G.R. Gopinath, G.R. Wu, L. Matthews, S. Lewis, E. Birney, L. Stein, Reactome: a knowledgebase of biological pathways, *Nucleic Acids Res.*, 33 (2005) D428-D432.

[13] D. Szklarczyk, A.L. Gable, D. Lyon, A. Junge, S. Wyder, J. Huerta-Cepas, M. Simonovic, N.T. Doncheva, J.H. Morris, P. Bork, L.J. Jensen, C. Mering, STRING v11: protein-protein association networks with increased coverage, supporting functional discovery in genome-wide experimental datasets, *Nucleic Acids Res.*, 47 (2019) D607-D613.

[14] S. Durinck, Y. Moreau, A. Kasprzyk, S. Davis, B. De Moor, A. Brazma, W. Huber, BioMart and Bioconductor: a powerful link between biological databases and microarray data analysis, *Bioinformatics*, 21 (2005) 3439-3440.

[15] D.E. Gordon, G.M. Jang, M. Bouhaddou, J. Xu, K. Obernier, K.M. White, M.J. O'Meara, V.V. Rezelj, J.Z. Guo, D.L. Swaney, T.A. Tummino, R. Hüttenhain, R.M. Kaake, A.L. Richards, B. Tutuncuoglu, H. Foussard, J. Batra, K. Haas, M. Modak, M. Kim, P. Haas, B.J. Polacco, H. Braberg, J.M. Fabius, M. Eckhardt, M. Soucheray, M.J. Bennett, M. Cakir, M.J. McGregor, Q. Li, B. Meyer, F. Roesch, T. Vallet, A. Mac Kain, L. Miorin, E. Moreno, Z.Z.C. Naing, Y. Zhou, S. Peng, Y. Shi, Z. Zhang, W. Shen, I.T.

Kirby, J.E. Melnyk, J.S. Chorba, K. Lou, S.A. Dai, I. Barrio-Hernandez, D. Memon, C. Hernandez-Armenta, J. Lyu, C.J.P. Mathy, T. Perica, K.B. Pilla, S.J. Ganesan, D.J. Saltzberg, R. Rakesh, X. Liu, S.B. Rosenthal, L. Calviello, S. Venkataramanan, J. Liboy-Lugo, Y. Lin, X.-P. Huang, Y. Liu, S.A. Wankowicz, M. Bohn, M. Safari, F.S. Ugur, C. Koh, N.S. Savar, Q.D. Tran, D. Shengjuler, S.J. Fletcher, M.C. O'Neal, Y. Cai, J.C.J. Chang, D.J. Broadhurst, S. Klippsten, P.P. Sharp, N.A. Wenzell, D. Kuzuoglu-Ozturk, H.-Y. Wang, R. Trenker, J.M. Young, D.A. Cavero, J. Hiatt, T.L. Roth, U. Rathore, A. Subramanian, J. Noack, M. Hubert, R.M. Stroud, A.D. Frankel, O.S. Rosenberg, K.A. Verba, D.A. Agard, M. Ott, M. Emerman, N. Jura, M. von Zastrow, E. Verdin, A. Ashworth, O. Schwartz, C. d'Enfert, S. Mukherjee, M. Jacobson, H.S. Malik, D.G. Fujimori, T. Ideker, C.S. Craik, S.N. Floor, J.S. Fraser, J.D. Gross, A. Sali, B.L. Roth, D. Ruggero, J. Taunton, T. Kortemme, P. Beltrao, M. Vignuzzi, A. García-Sastre, K.M. Shokat, B.K. Shoichet, N.J. Krogan, A SARS-CoV-2 protein interaction map reveals targets for drug repurposing, *Nature*, 583 (2020) 459-468.

Figure S1

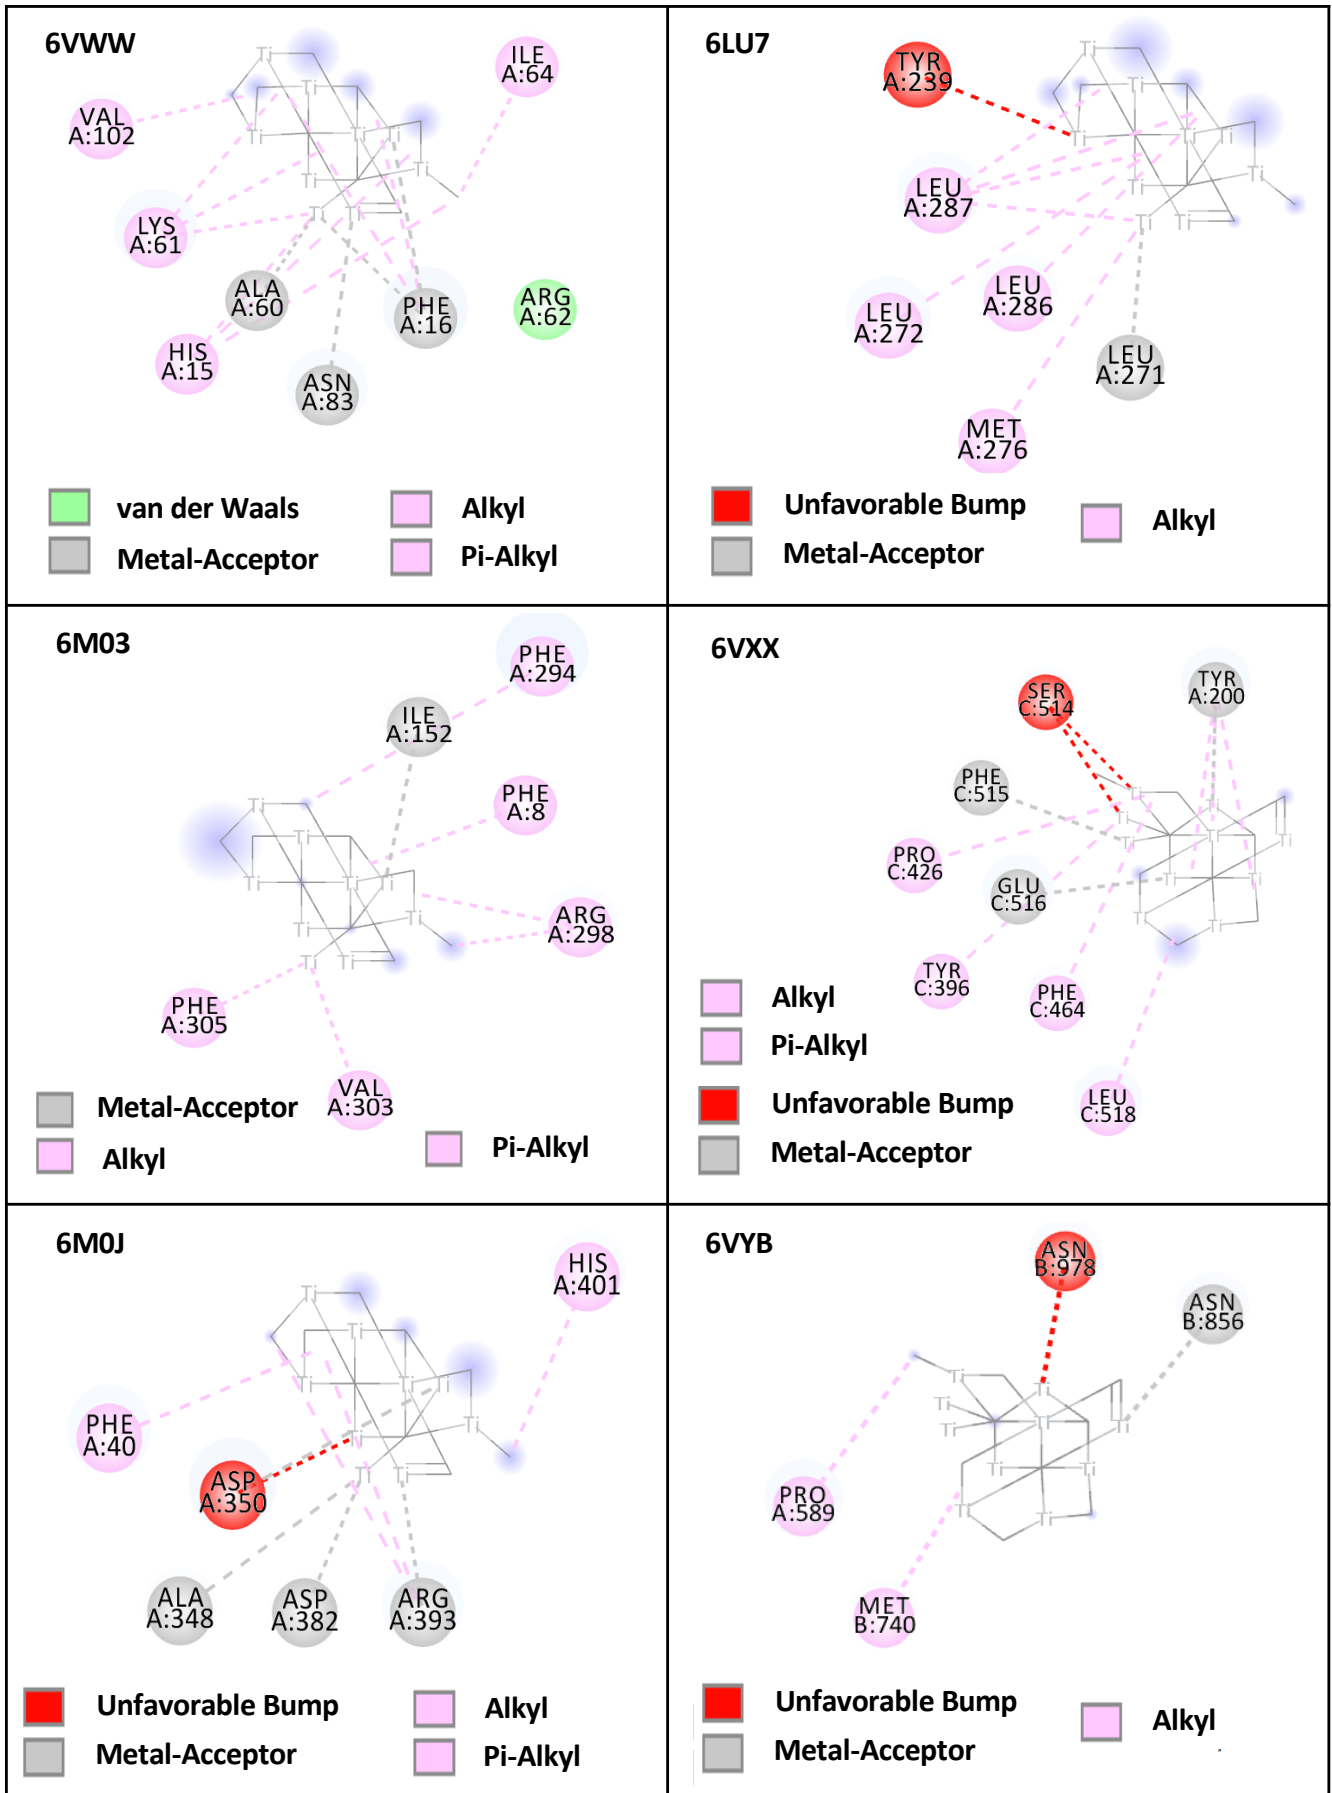

**A**

**Biological Process**

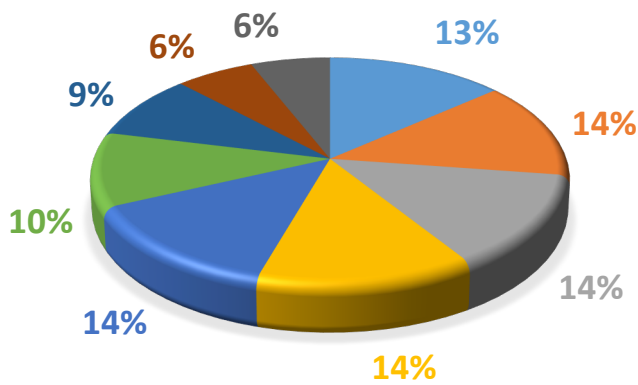

- DNA replication-dependent nucleosome assembly
- DNA replication-independent nucleosome assembly
- DNA-templated transcription initiation
- negative regulation of megakaryocyte differentiation
- protein heterotetramerization
- intracellular protein transport
- transport
- regulation of transcription DNA-templated

**B**

**Molecular Function**

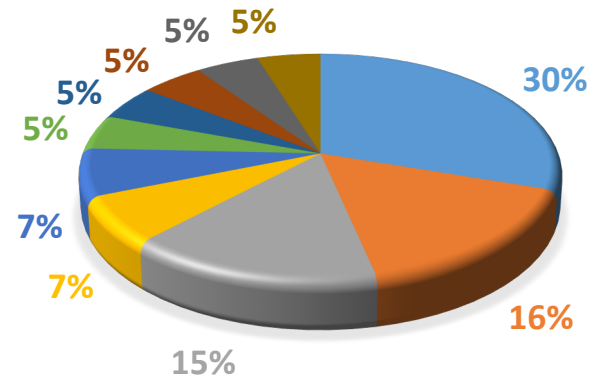

- poly(A) RNA binding
- DNA binding
- ATP binding
- GTP binding
- zinc ion binding
- calcium ion binding
- chromatin binding
- GTPase activity

Figure S3

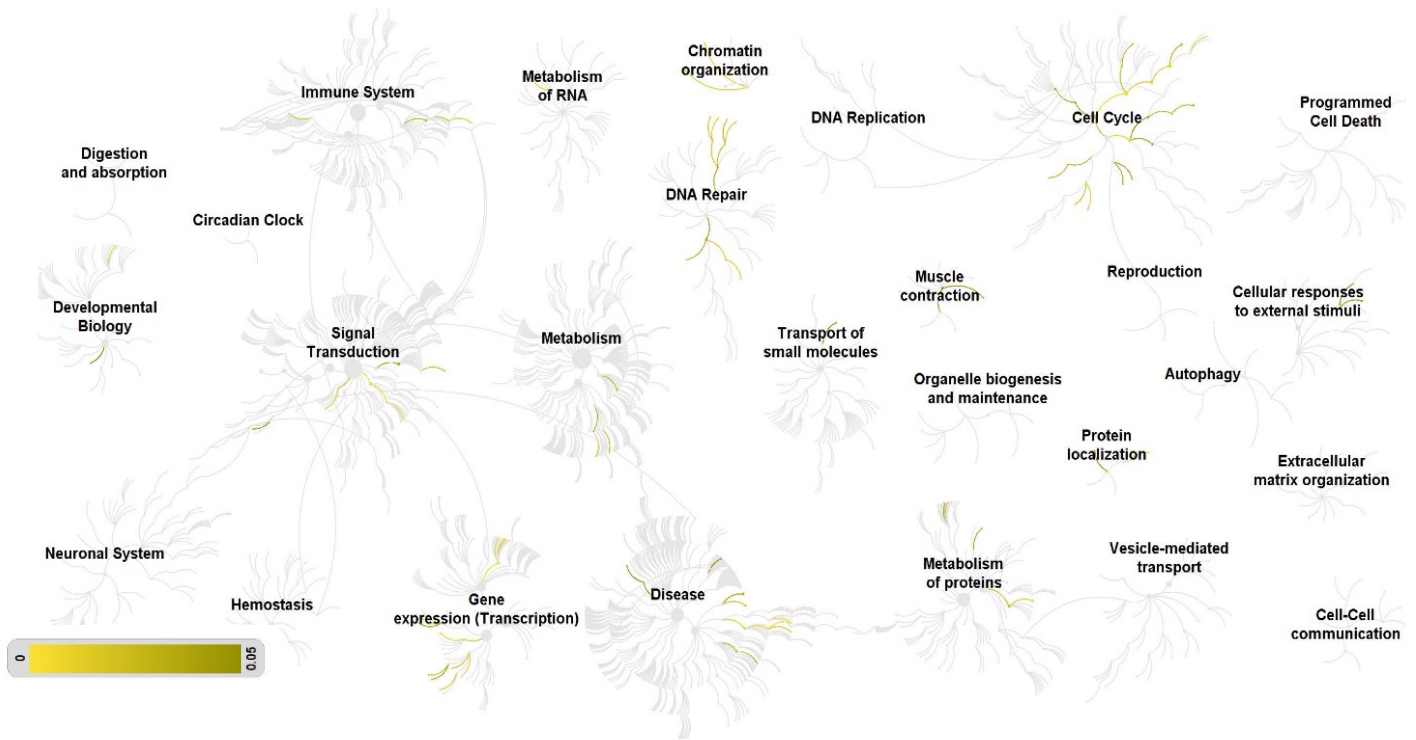

Figure S4

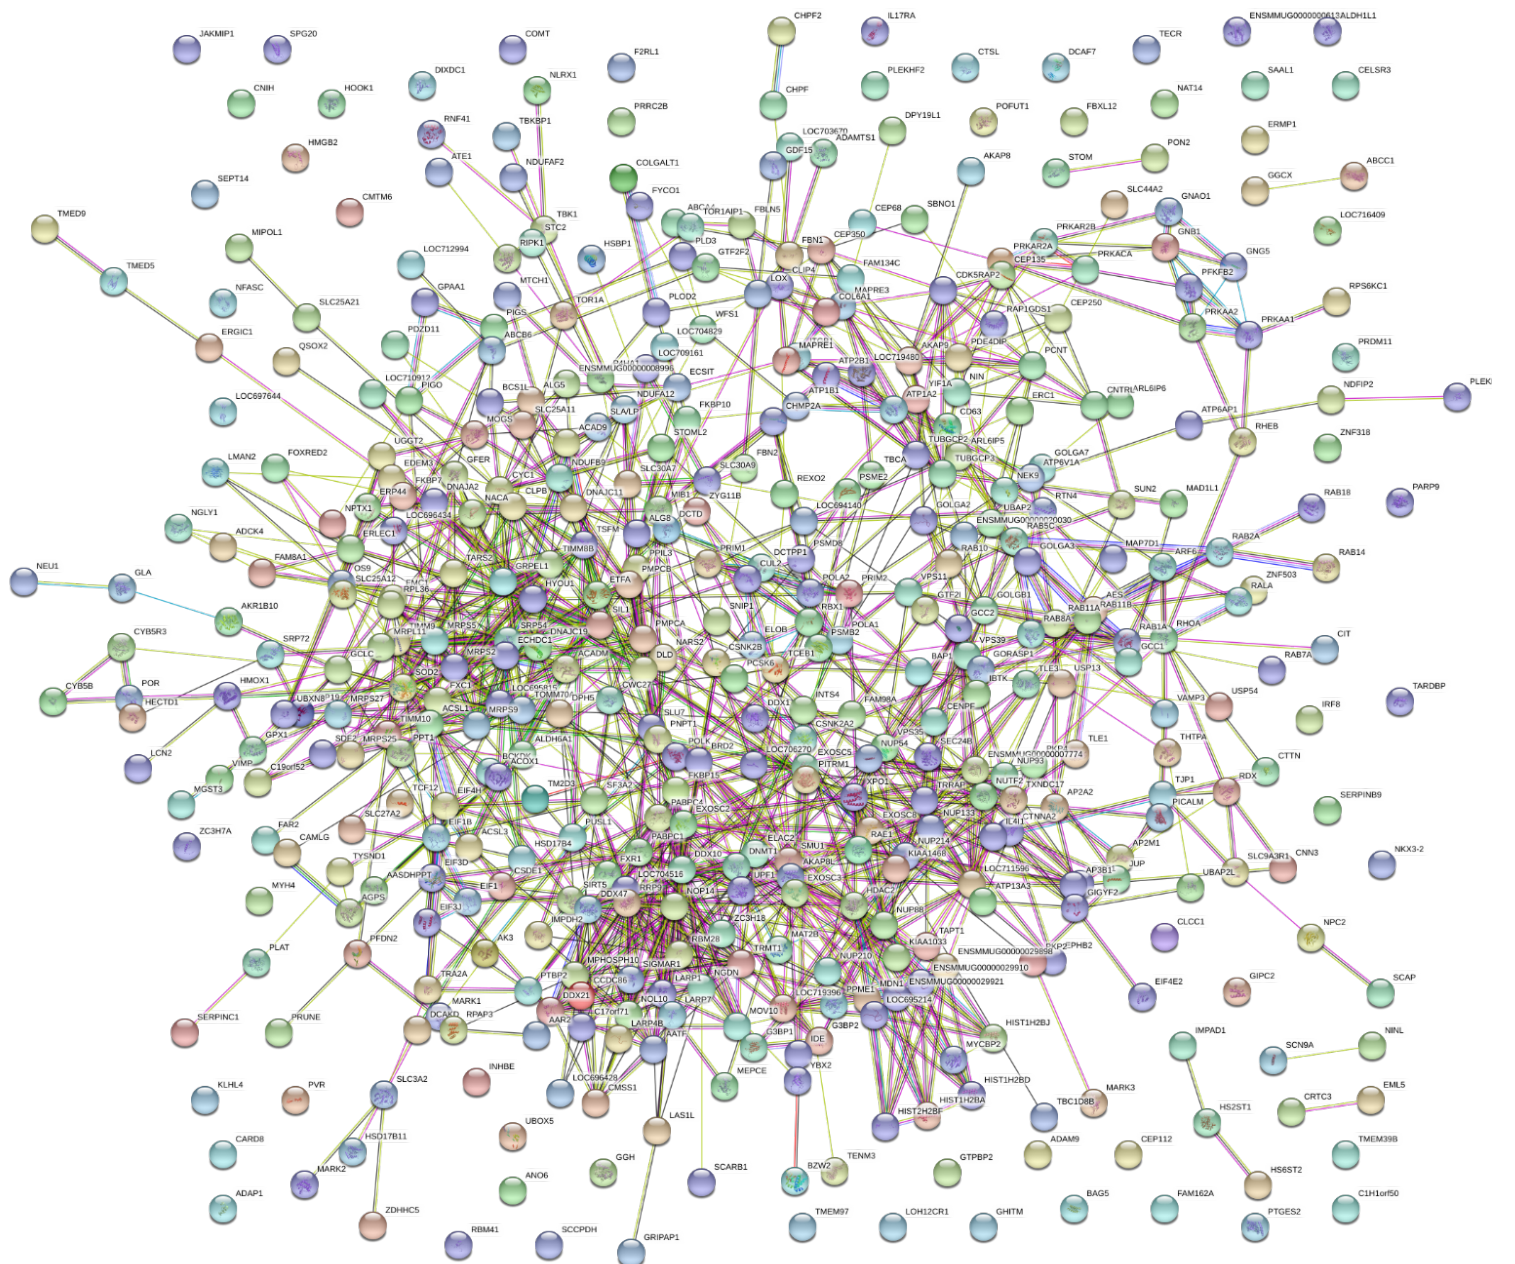



**A**

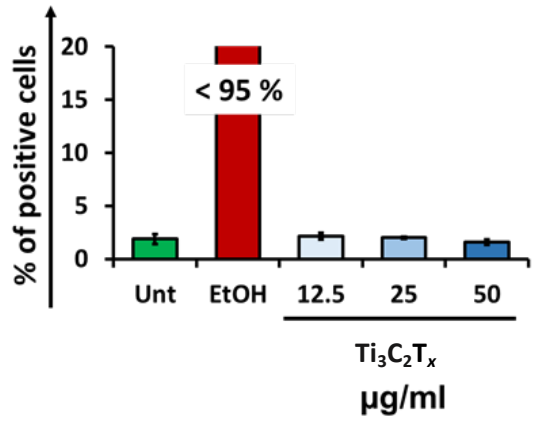

**B**

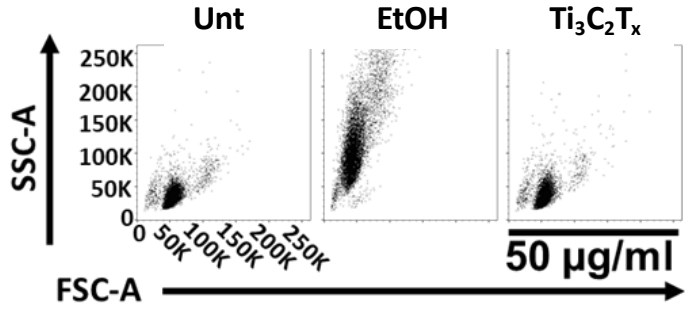

**C**

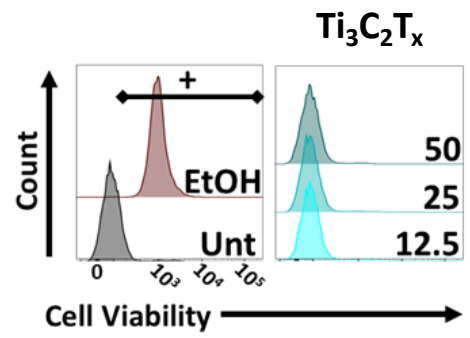

**D**

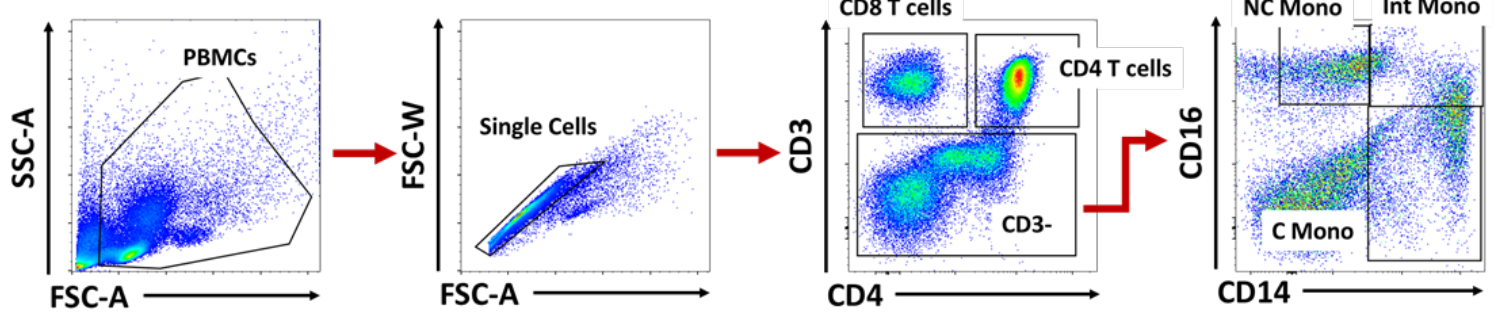

**E**

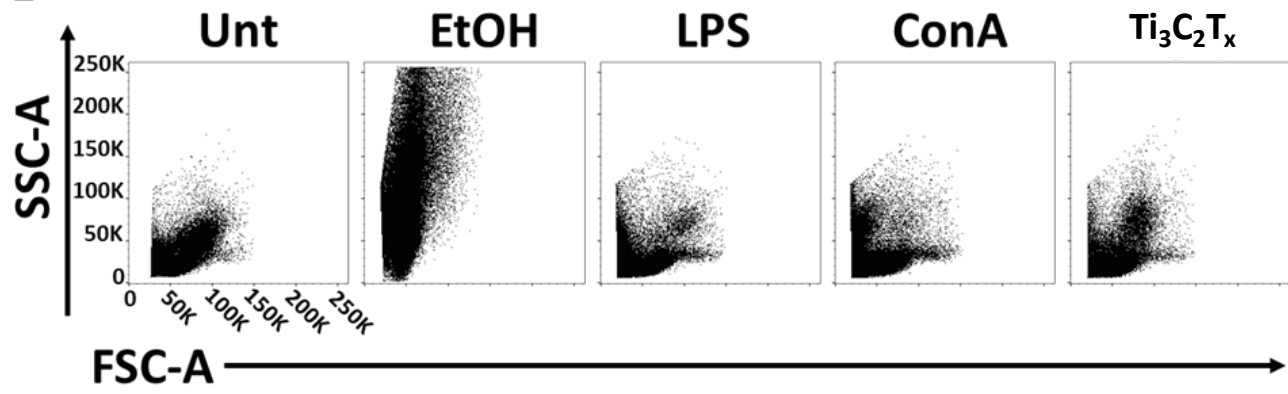

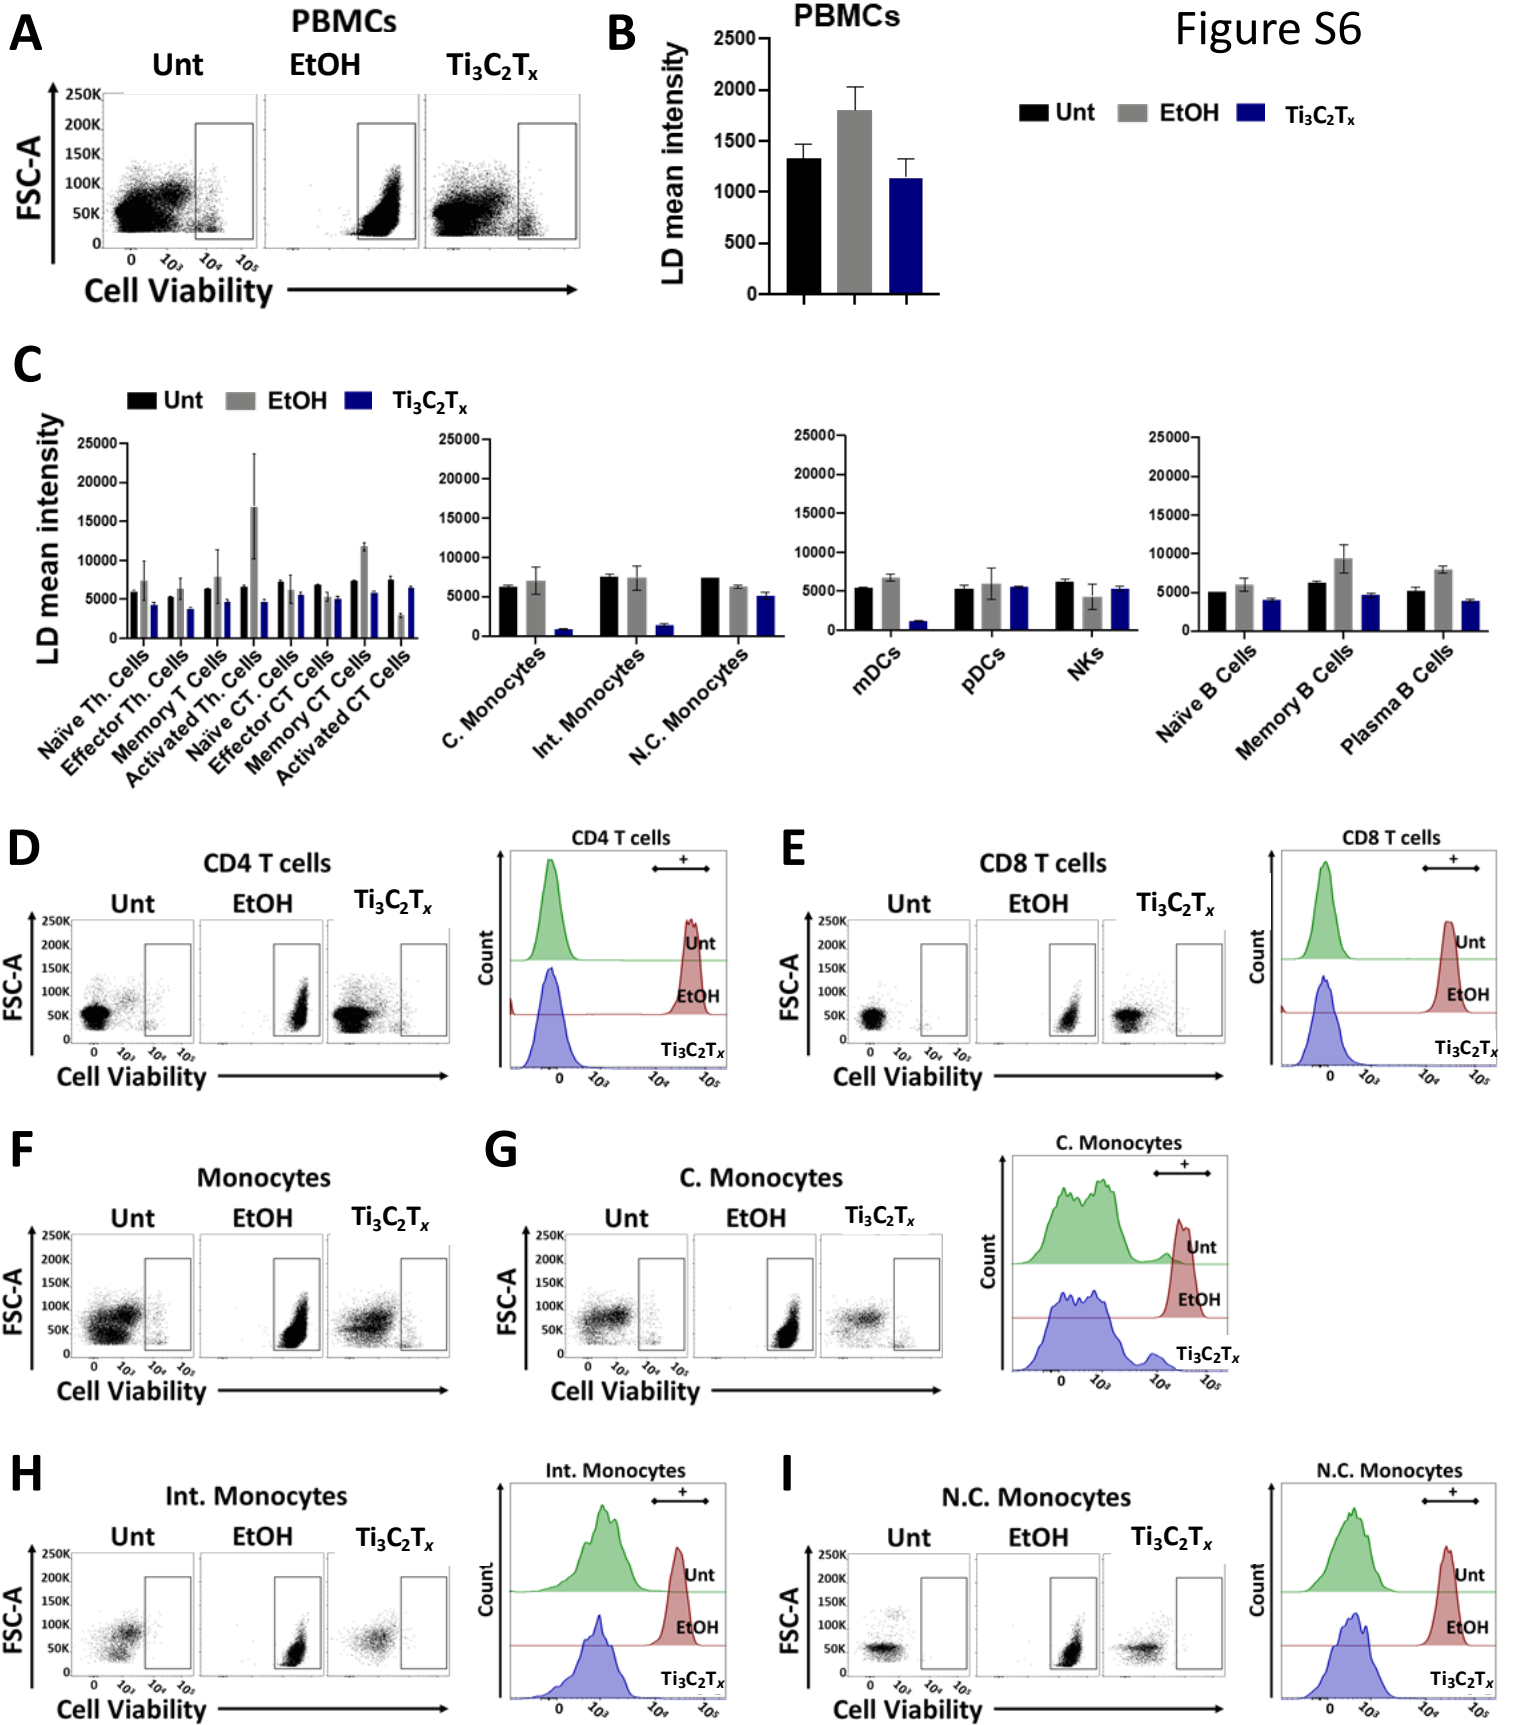

Figure S7

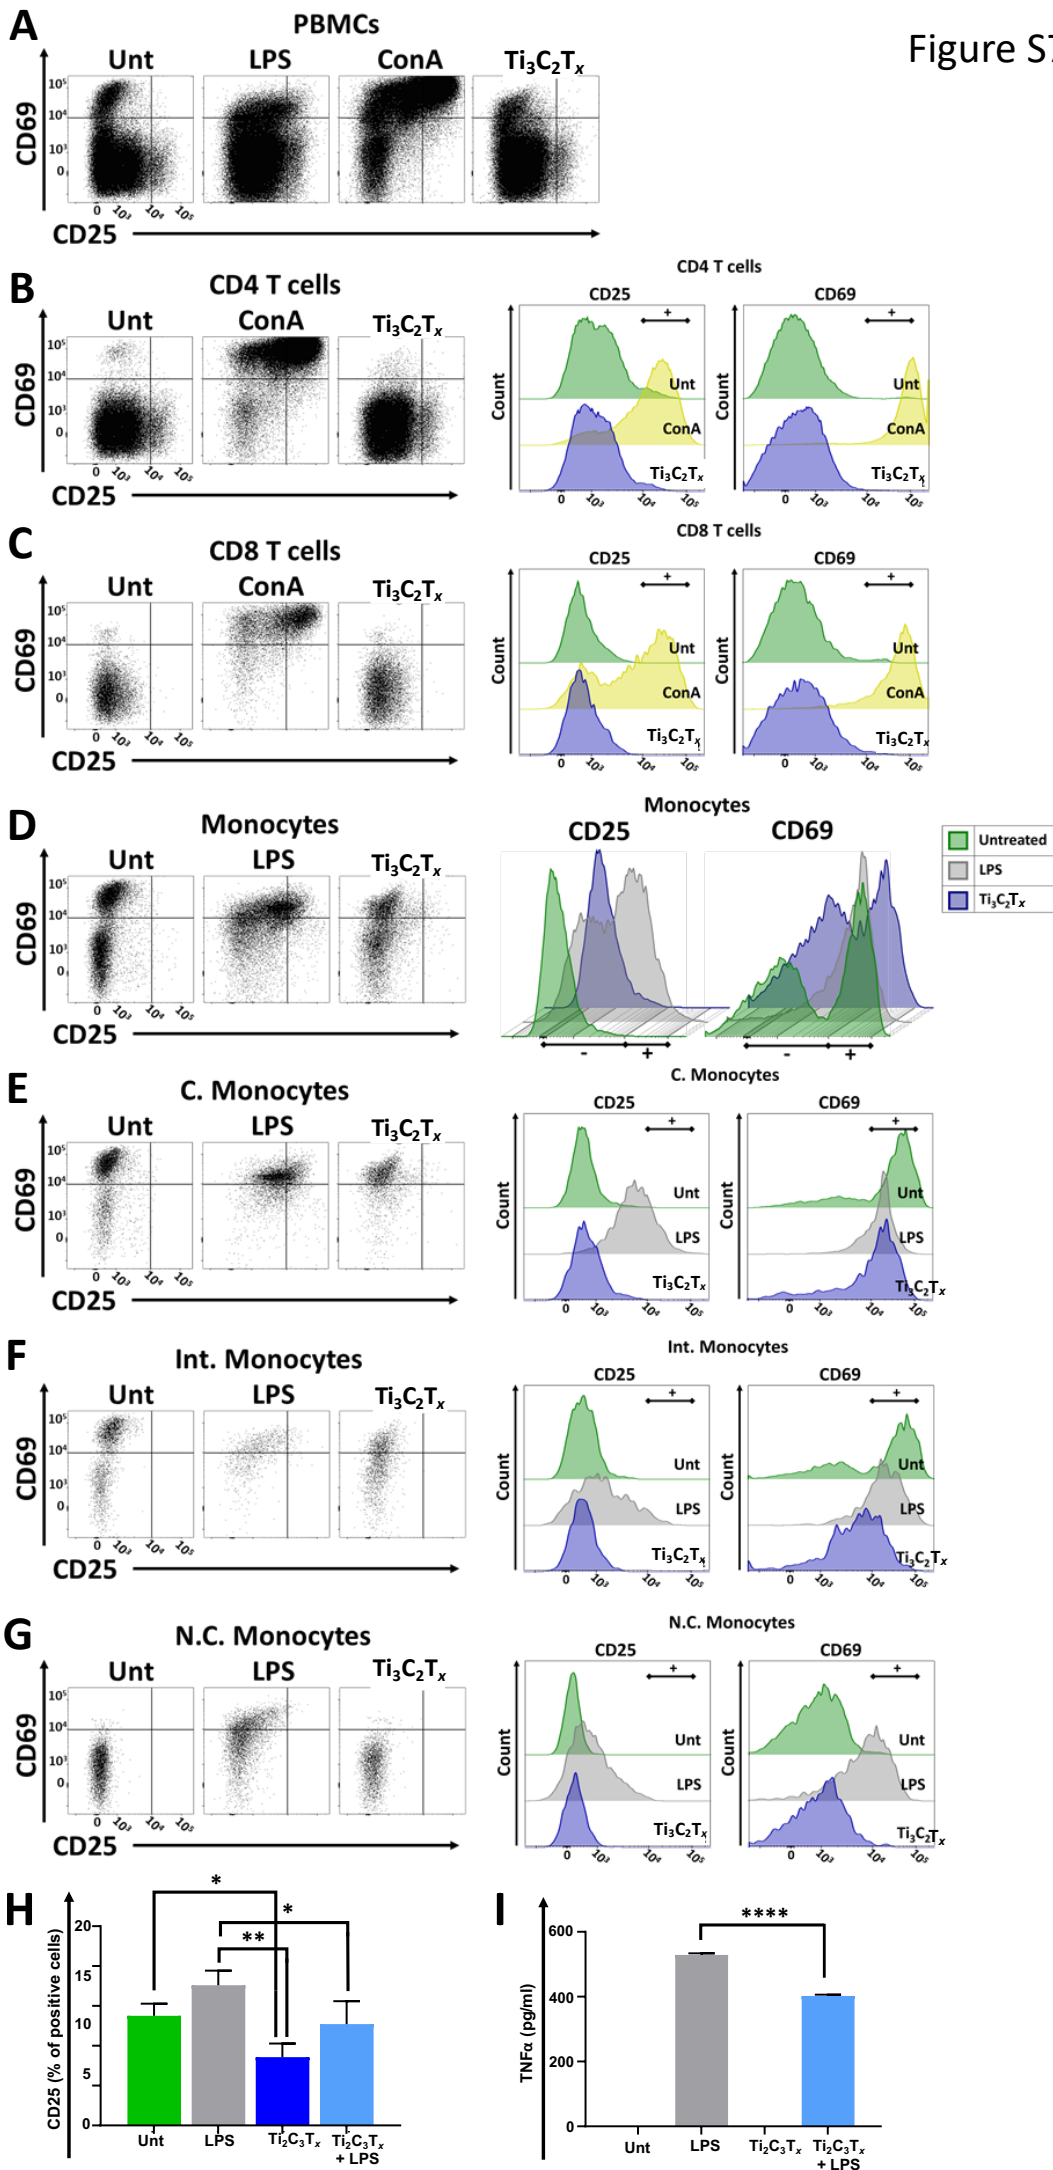

Figure S8

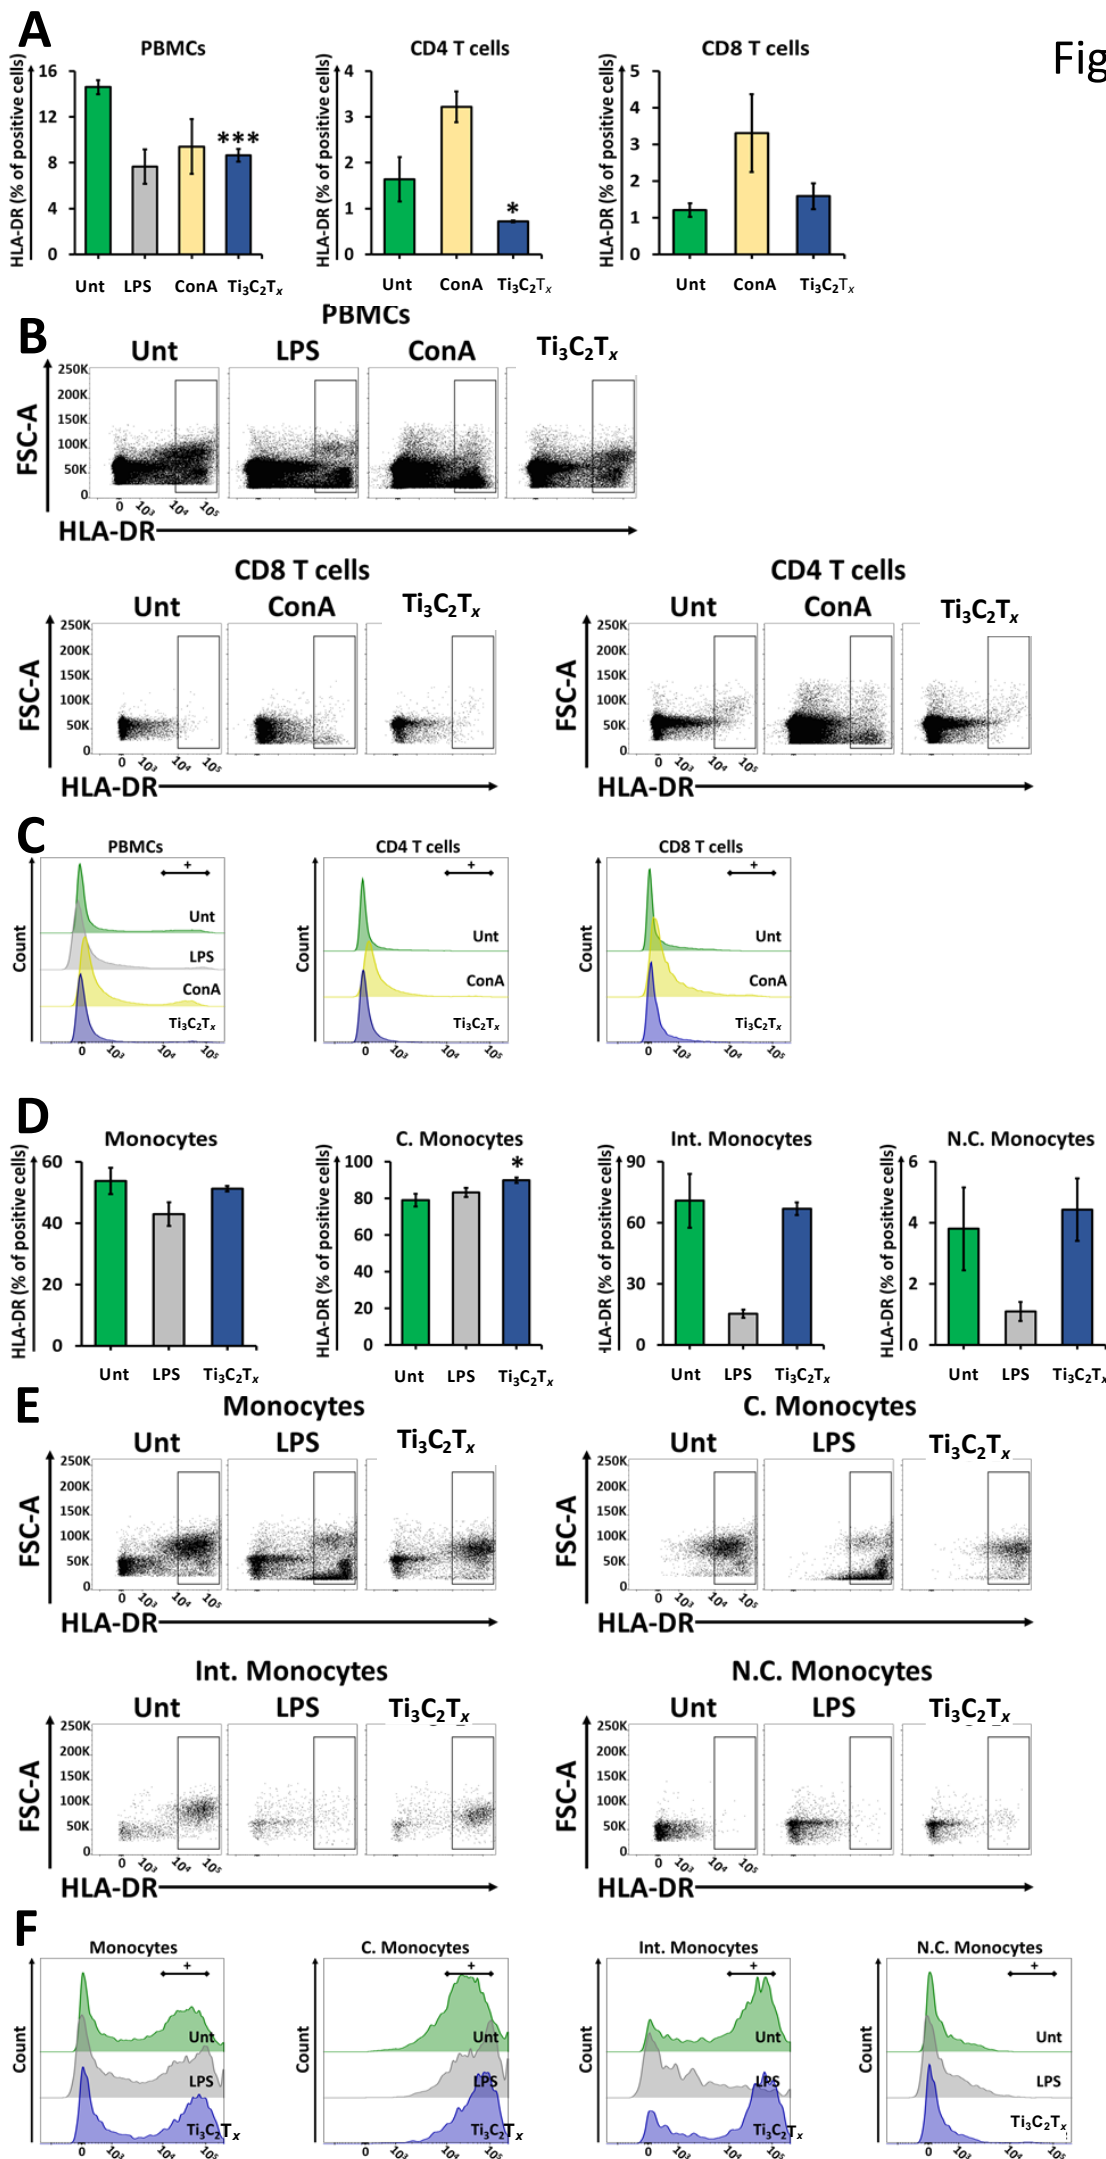

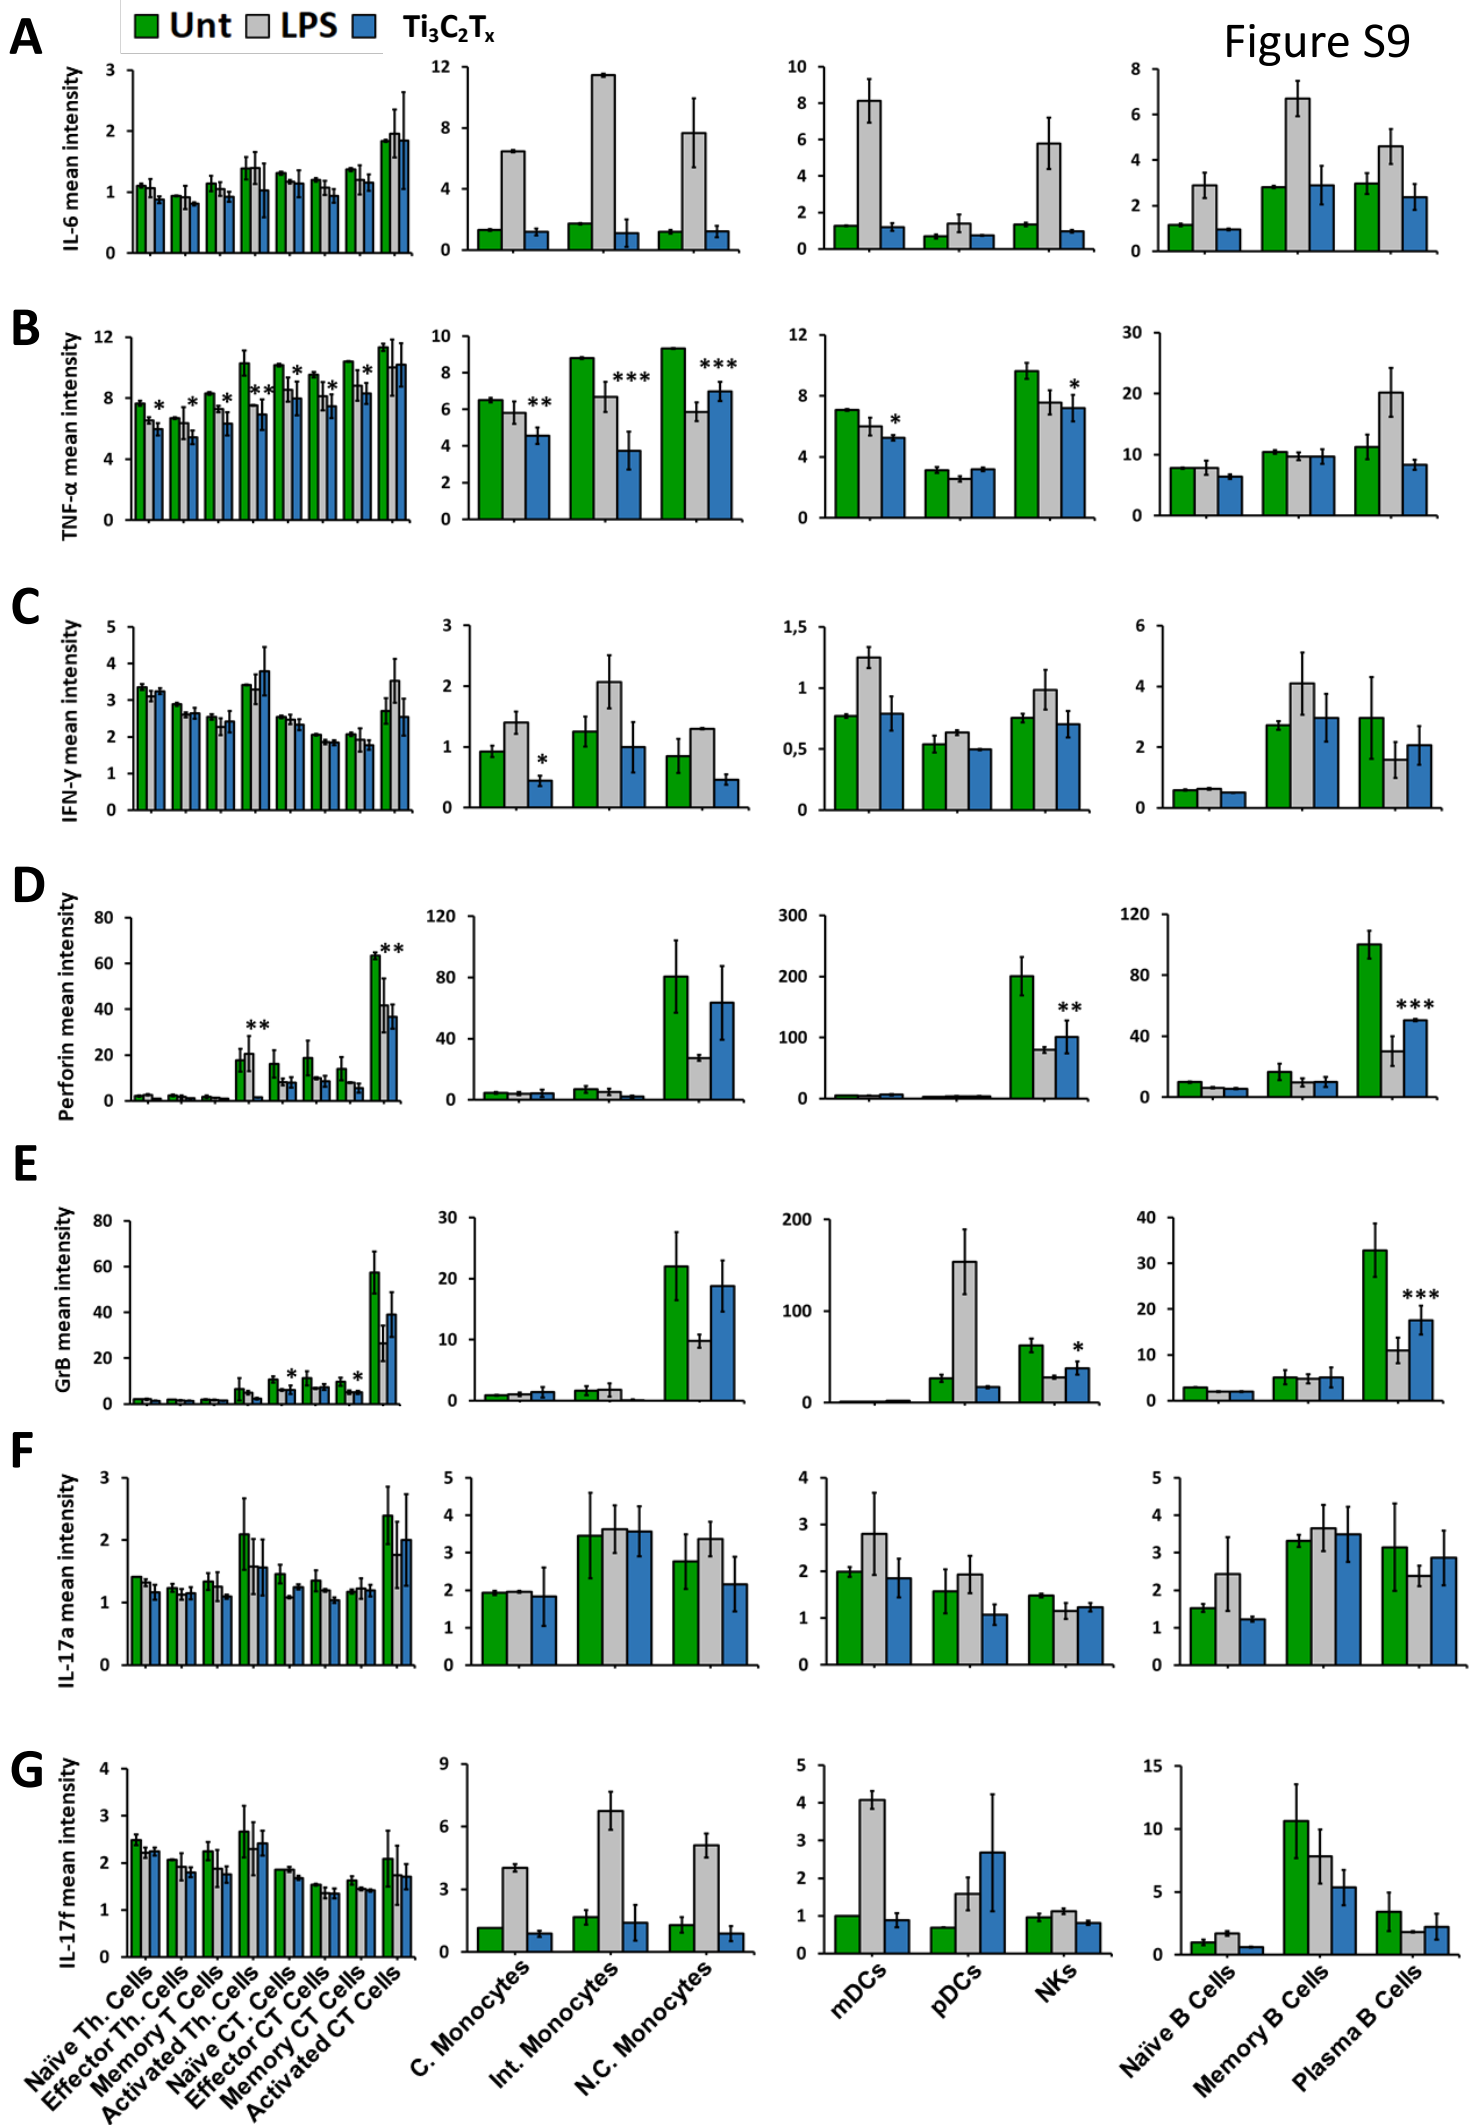

**Leukocytes**

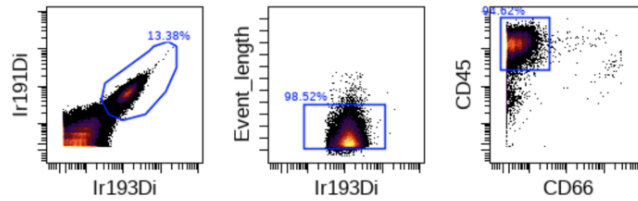

**T helper lymphocytes**

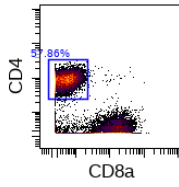

**T cells**

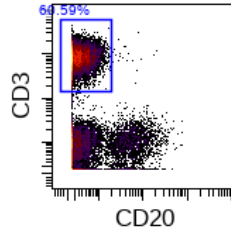

**T cytotoxic lymphocytes**

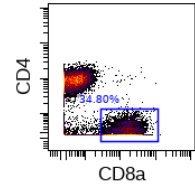

**Naive**

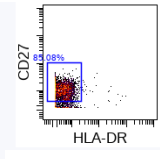

**Activated**

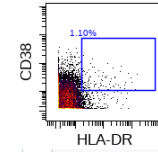

**Naive**

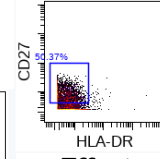

**Activated**

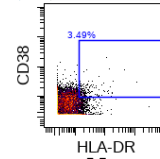

**Effector**

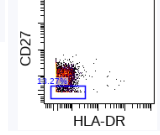

**Memory**

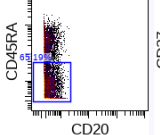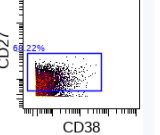

**Effector**

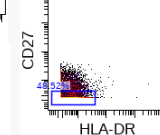

**Memory**

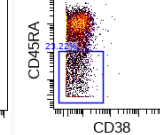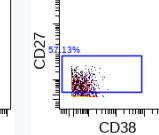

**B cells**

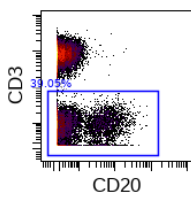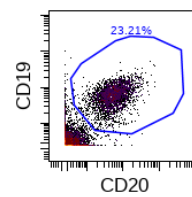

**NK cells**

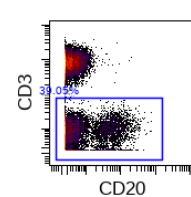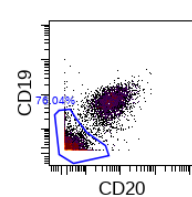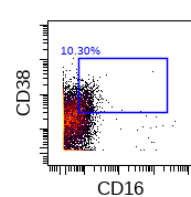

**Naive**

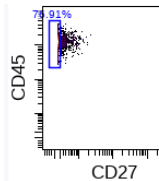

**Memory**

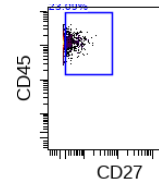

**Plasmacytoid**

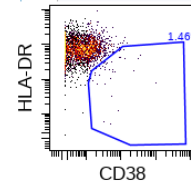

**Monocytes**

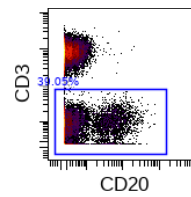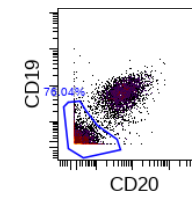

**pDCs**

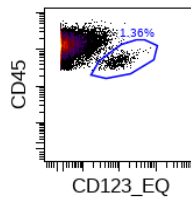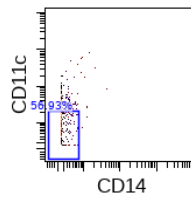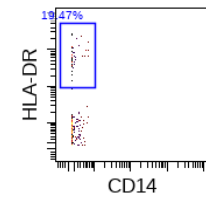

**Classical**

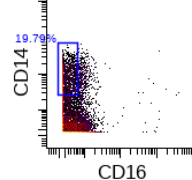

**mDCs**

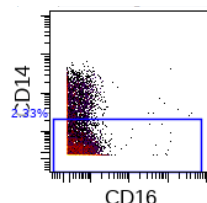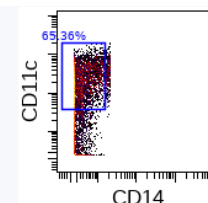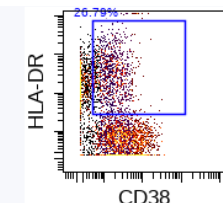

**Non classical**

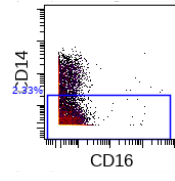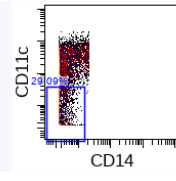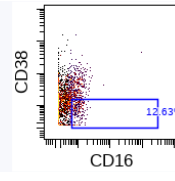

Supplement: mmc4.pdf [file mmc4.pdf]
